# Supplementary material for: High performance NIR-I to NIR-II emission of a Cr3+-doped Cs2NaLuCl6 phosphor with an IQE and EQE of up to 92.9% and 60.75%
Source: Royal Society of Chemistry journal article supplement (doi:10.1039/d4qi01418a), 2024-01-01

**High Performance NIR-I to NIR-II emission of Cr<sup>3+</sup>-doped Cs<sub>2</sub>NaLuCl<sub>6</sub>  
phosphor with IQE and EQE of up to 92.9% and 60.75%**

Fengmei Zhu<sup>1,3</sup>, Yuan Gao<sup>1,2\*</sup>, Jianbei Qiu<sup>1,2,3\*</sup>

<sup>1</sup>*Faculty of Material Science and Engineering, Kunming University of Science and  
Technology, Kunming 650093, China*

<sup>2</sup>*Key Lab. of Advanced Materials of Yunnan Province, Kunming 650093, China*

<sup>3</sup>*Southwest United Graduate School, Kunming 650092, China*

**Corresponding Author**

\*E-mail: Yuan Gao (1251719335@qq.com), Jianbei Qiu (qiu@kust.edu.cn).

**Table S1.** Crystallographic parameters obtained from XRD Rietveld refinement of CNLC:xCr (x=0, 0.005, 0.008, 0.01, 0.012, and 0.017), respectively.

|                   | CNLC         | CNLC:0.<br>005Cr | CNLC:0.0<br>08Cr | CNLC:0.0<br>1Cr | CNLC:0.0<br>12Cr | CNLC:0.0<br>17Cr |
|-------------------|--------------|------------------|------------------|-----------------|------------------|------------------|
| Crystal structure | Cubic        | Cubic            | Cubic            | Cubic           | Cubic            | Cubic            |
| Space group       | <i>Fm-3m</i> | <i>Fm-3m</i>     | <i>Fm-3m</i>     | <i>Fm-3m</i>    | <i>Fm-3m</i>     | <i>Fm-3m</i>     |
| a, Å              | 10.8169      | 10.8136          | 10.8114          | 10.809          | 10.8042          | 10.8017          |
| V, Å <sup>3</sup> | 1265.635     | 1264.477         | 1263.705         | 1262.864        | 1261.182         | 1260.307         |
| R <sub>p</sub> %  | 5.87         | 7.62             | 6.01             | 7.45            | 7.31             | 8.97             |
| R <sub>wp</sub> % | 5.22         | 5.92             | 6.80             | 8.61            | 8.41             | 7.66             |
| χ <sup>2</sup> %  | 2.64         | 2.99             | 2.24             | 2.42            | 2.77             | 2.91             |

**Figure S1.** Rietveld refinement profiles of (a) CNLC:0.005Cr, (b) CNLC:0.008Cr, (c) CNLC:0.01Cr, (d) CNLC:0.012Cr, and (f) CNLC:0.017Cr, respectively.

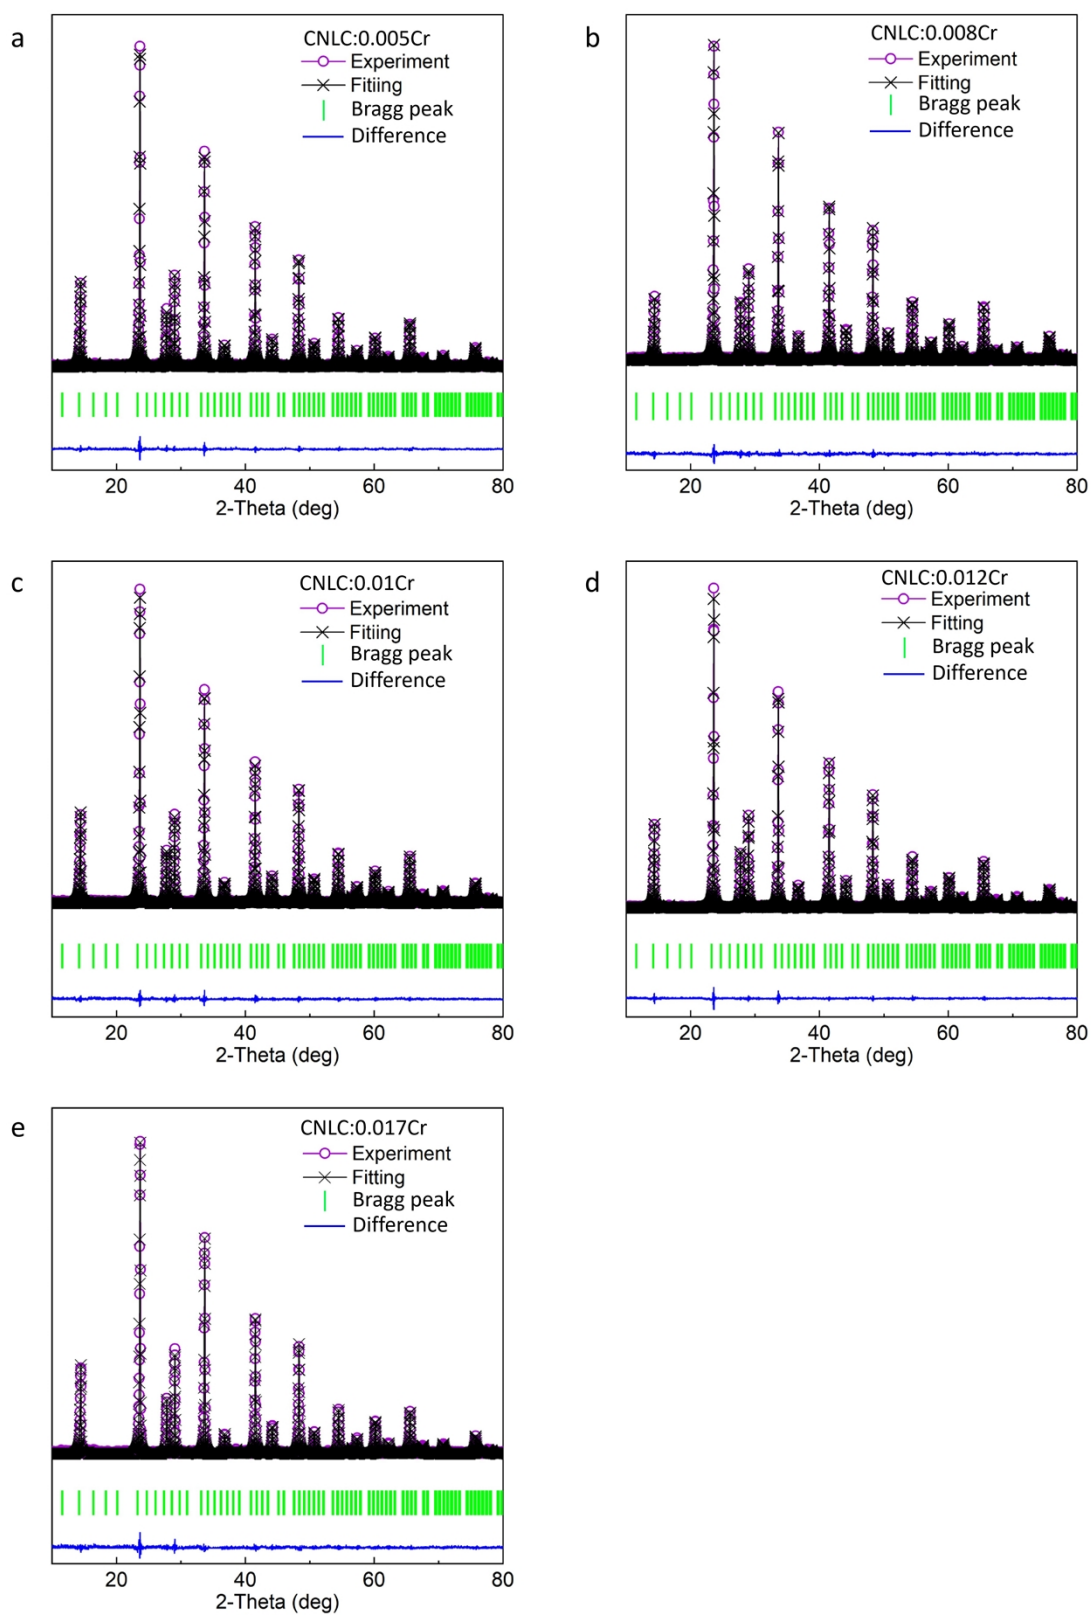

**Figure S2.** The measured EDS spectrum of CNLC:0.008Cr phosphor.

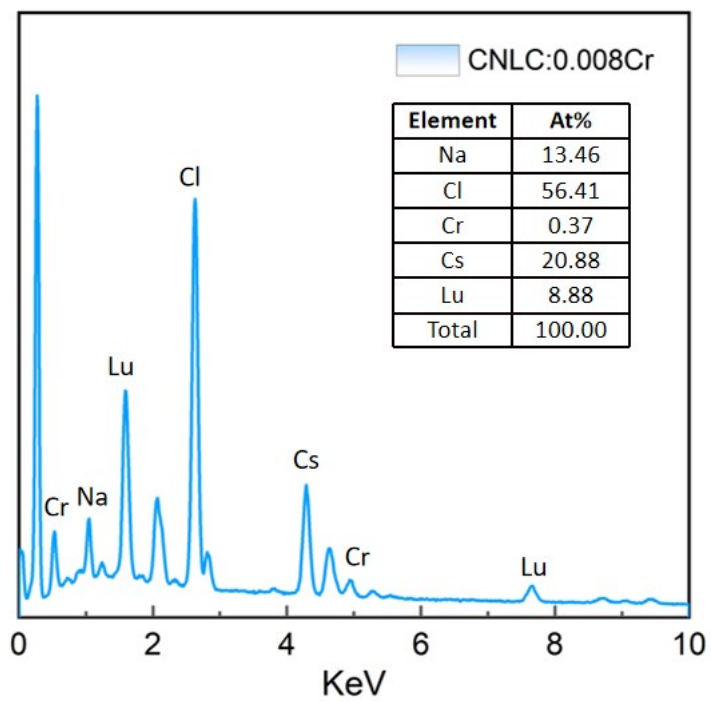

**Figure S3.** The plot of absorption coefficient against photon energy for CNLC host.

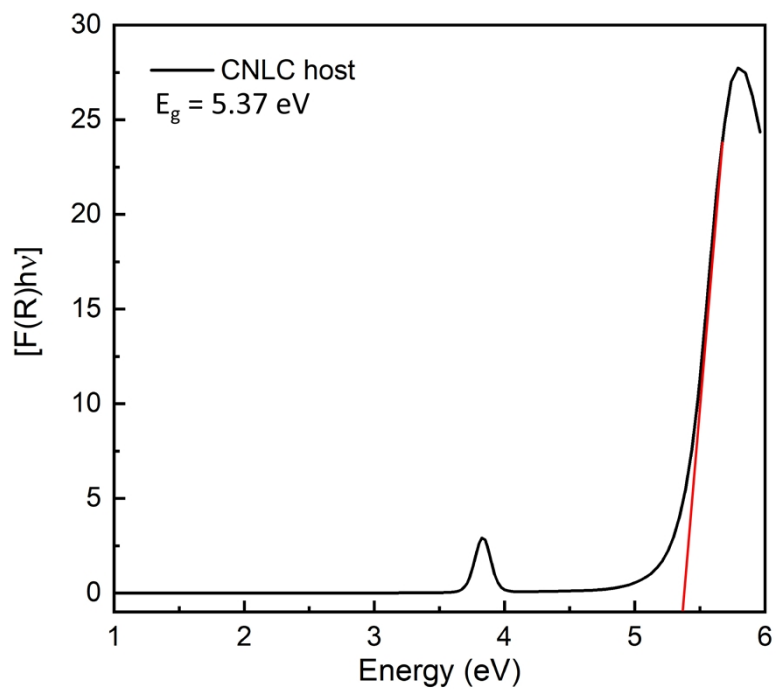

**Figure S4.** The Arrhenius plot of  $\ln(I_0/I_T-1)$  versus  $1/K_B T$  of CNLC:0.008Cr phosphor.

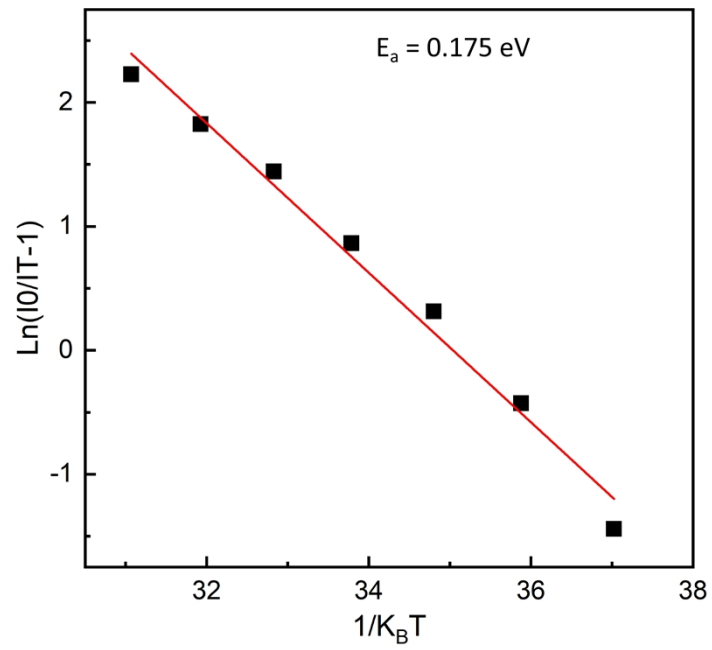

Supplement: d4qi01418a1.pdf [file d4qi01418a1.pdf]
